# Supplementary material
Source: publisher site journal article supplement (https://www.dovepress.com/article/272755)
Supplement: Supplementary file 1 [file get_supplementary_file.php]

|  | univariate analysis | | | multivariate  analysis | | |
| --- | --- | --- | --- | --- | --- | --- |
|  | *P* | Exp(B) | 95 CI of Exp(B) | *P* | Exp(B) | 95 CI of Exp(B) |
| menopause | <0.001 | 0.032 | 0.006-0.161 | 0.006 | 0.077 | 0.012-0.478 |
| BMI | 0.551 | 0.945 | 0.783-1.139 | - | - | - |
| parity | 0.328 | 1.434 | 0.696-2.952 | - | - | - |
| menarche age | 0.374 | 1.146 | 0.848-1.549 | - | - | - |
| endometrial thickness | 0.121 | 0.857 | 0.705-1.042 | 0.082 | 0.733 | 0.516-1.04 |
| endometrial cavity fluid | 0.013 | 0.051 | 0.005-0.534 | 0.068 | 0.063 | 0.003-1.23 |

Supplementary Table 1. Binary logistic regression for insufficient specimens of D&C

Abbreviations: D&C:dilation and curettage; BMI: Body Mass Index
